# Supplementary material for: Pyrazolium salts as a new class of ionic liquid crystals
Source: Royal Society of Chemistry journal article supplement (doi:10.1039/c2jm31939j), 2012-01-01
Supplement: c2jm31939j.pdf [file c2jm31939j.pdf]

## Supporting Information

### Pyrazolium salts as a new class of ionic liquid crystals

Ignacio Sánchez,<sup>a</sup> José Antonio Campo,<sup>a</sup> José Vicente Heras,<sup>a</sup> M. Rosario Torres,<sup>b</sup>  
and Mercedes Cano<sup>\*a</sup>

**Pyrazolium compounds of the type [H<sub>2</sub>pz<sup>R(n)</sup>][A]** ([A] = Cl<sup>-</sup>, BF<sub>4</sub><sup>-</sup>, ReO<sub>4</sub><sup>-</sup>, SbF<sub>6</sub><sup>-</sup>, CF<sub>3</sub>SO<sub>3</sub><sup>-</sup>, CH<sub>3</sub>-*p*-C<sub>6</sub>H<sub>4</sub>SO<sub>3</sub><sup>-</sup>; R = C<sub>6</sub>H<sub>4</sub>OC<sub>n</sub>H<sub>2n+1</sub>, n = 1, 8, 10, 12, 14, 16, 18)

**[H<sub>2</sub>pz<sup>R(1)</sup>][Cl] (CI-1):** colourless solid (42%). Elemental analysis: Found: C, 56.6; H, 5.2; N, 13.3%. C<sub>10</sub>H<sub>11</sub>N<sub>2</sub>OCl requires C, 57.0; H, 5.3; N, 13.3%.  $\nu_{\max}(\text{KBr})/\text{cm}^{-1}$ : 3152, 3083  $\nu(\text{NH})$ , 1610  $\nu(\text{C}=\text{C} + \text{C}=\text{N})$ .  $\delta_{\text{H}}$  (300 MHz; CDCl<sub>3</sub>; Me<sub>4</sub>Si): 3.87 (3 H, s, CH<sub>3</sub>), 6.72 (1 H, d, *J* 2.8, H<sub>4</sub>), 7.05 (2 H, d, *J* 8.9, H<sub>m</sub>), 7.91 (1 H, d, *J* 2.8, H<sub>5</sub>), 7.96 (2 H, d, *J* 8.9, H<sub>o</sub>).

**[H<sub>2</sub>pz<sup>R(8)</sup>][Cl] (CI-8):** colourless solid (80%). Elemental analysis: Found: C, 65.8; H, 7.8; N, 9.1%. C<sub>17</sub>H<sub>25</sub>N<sub>2</sub>OCl requires C, 66.1; H, 8.2; N, 9.1%.  $\nu_{\max}(\text{KBr})/\text{cm}^{-1}$ : 3144, 3080  $\nu(\text{NH})$ , 1615  $\nu(\text{C}=\text{C} + \text{C}=\text{N})$ .  $\delta_{\text{H}}$  (300 MHz; CDCl<sub>3</sub>; Me<sub>4</sub>Si): 0.89 (3 H, t, *J* 6.7, CH<sub>3</sub>), 1.30 (10 H, m, CH<sub>2</sub>), 1.81 (2 H, m, CH<sub>2</sub>), 4.01 (2 H, t, *J* 6.7, OCH<sub>2</sub>), 6.71 (1 H, d, *J* 2.8, H<sub>4</sub>), 7.02 (2 H, d, *J* 8.9, H<sub>m</sub>), 7.90 (1 H, d, *J* 2.8, H<sub>5</sub>), 7.93 (2 H, d, *J* 8.9, H<sub>o</sub>).

**[H<sub>2</sub>pz<sup>R(10)</sup>][Cl] (CI-10):** colourless solid (86%). Elemental analysis: Found: C, 67.9; H, 8.4; N, 8.4%. C<sub>19</sub>H<sub>29</sub>N<sub>2</sub>OCl requires C, 67.7; H, 8.7; N, 8.3%.  $\nu_{\max}(\text{KBr})/\text{cm}^{-1}$ : 3144, 3083  $\nu(\text{NH})$ , 1615  $\nu(\text{C}=\text{C} + \text{C}=\text{N})$ .  $\delta_{\text{H}}$  (300 MHz; CDCl<sub>3</sub>; Me<sub>4</sub>Si): 0.88 (3 H, t, *J* 6.7, CH<sub>3</sub>), 1.27 (14 H, m, CH<sub>2</sub>), 1.80 (2 H, m, CH<sub>2</sub>), 4.00 (2 H, t, *J* 6.7, OCH<sub>2</sub>), 6.71 (1 H, d, *J* 2.8, H<sub>4</sub>), 7.02 (2 H, d, *J* 8.9, H<sub>m</sub>), 7.91 (1 H, d, *J* 2.8, H<sub>5</sub>), 7.93 (2 H, d, *J* 8.9, H<sub>o</sub>).

**[H<sub>2</sub>pz<sup>R(12)</sup>][Cl] (CI-12):** colourless solid (87%). Elemental analysis: Found: C, 68.9; H, 8.9; N, 7.9%. C<sub>21</sub>H<sub>33</sub>N<sub>2</sub>OCl requires C, 69.1; H, 9.1; N, 7.7%.  $\nu_{\max}(\text{KBr})/\text{cm}^{-1}$ : 3144, 3083  $\nu(\text{NH})$ , 1615  $\nu(\text{C}=\text{C} + \text{C}=\text{N})$ .  $\delta_{\text{H}}$  (300 MHz; CDCl<sub>3</sub>; Me<sub>4</sub>Si): 0.88 (3 H, t, *J* 6.7, CH<sub>3</sub>), 1.27 (18 H, m, CH<sub>2</sub>), 1.81 (2 H, m, CH<sub>2</sub>), 4.01 (2 H, t, *J* 6.7, OCH<sub>2</sub>), 6.71 (1 H, d, *J* 2.8, H<sub>4</sub>), 7.02 (2 H, d, *J* 8.9, H<sub>m</sub>), 7.90 (1 H, d, *J* 2.8, H<sub>5</sub>), 7.93 (2 H, d, *J* 8.9, H<sub>o</sub>).

**[H<sub>2</sub>pz<sup>R(14)</sup>][Cl] (CI-14):** colourless solid (76%). Elemental analysis: Found: C, 69.9; H, 9.1; N, 7.2%. C<sub>23</sub>H<sub>37</sub>N<sub>2</sub>OCl requires C, 70.3; H, 9.4; N, 7.1%.  $\nu_{\max}(\text{KBr})/\text{cm}^{-1}$ : 3145, 3082  $\nu(\text{NH})$ , 1615  $\nu(\text{C}=\text{C} + \text{C}=\text{N})$ .  $\delta_{\text{H}}$  (300 MHz; CDCl<sub>3</sub>; Me<sub>4</sub>Si): 0.88 (3 H, t, *J* 6.7, CH<sub>3</sub>), 1.26 (22 H, m, CH<sub>2</sub>), 1.80 (2 H, m, CH<sub>2</sub>), 4.01 (2 H, t, *J* 6.7, OCH<sub>2</sub>), 6.71 (1 H, d, *J* 2.8, H<sub>4</sub>), 7.02 (2 H, d, *J* 8.9, H<sub>m</sub>), 7.90 (1 H, d, *J* 2.8, H<sub>5</sub>), 7.93 (2 H, d, *J* 8.9, H<sub>o</sub>).

**[H<sub>2</sub>pz<sup>R(16)</sup>][Cl] (CI-16):** colourless solid (82%). Elemental analysis: Found: C, 71.2; H, 9.5; N, 6.6%. C<sub>25</sub>H<sub>41</sub>N<sub>2</sub>OCl requires C, 71.3; H, 9.8; N, 6.6%.  $\nu_{\max}(\text{KBr})/\text{cm}^{-1}$ : 3145, 3082  $\nu(\text{NH})$ , 1615  $\nu(\text{C}=\text{C} + \text{C}=\text{N})$ .  $\delta_{\text{H}}$  (300 MHz; CDCl<sub>3</sub>; Me<sub>4</sub>Si): 0.88 (3 H, t, *J* 6.7, CH<sub>3</sub>), 1.26 (26 H, m, CH<sub>2</sub>), 1.80 (2 H, m, CH<sub>2</sub>), 4.01 (2 H, t, *J* 6.7, OCH<sub>2</sub>), 6.71 (1 H, d, *J* 2.8, H<sub>4</sub>), 7.02 (2 H, d, *J* 8.9, H<sub>m</sub>), 7.90 (1 H, d, *J* 2.8, H<sub>5</sub>), 7.93 (2 H, d, *J* 8.9, H<sub>o</sub>).

**[H<sub>2</sub>pz<sup>R(18)</sup>][Cl] (CI-18):** colourless solid (83%). Elemental analysis: Found: C, 71.8; H, 9.8; N, 6.2%. C<sub>27</sub>H<sub>45</sub>N<sub>2</sub>OCl requires C, 72.2; H, 10.1; N, 6.2%.  $\nu_{\max}(\text{KBr})/\text{cm}^{-1}$ : 3145, 3083  $\nu(\text{NH})$ , 1616  $\nu(\text{C}=\text{C} + \text{C}=\text{N})$ .  $\delta_{\text{H}}$  (300 MHz; CDCl<sub>3</sub>; Me<sub>4</sub>Si): 0.88 (3 H, t, *J* 6.7, CH<sub>3</sub>), 1.26 (30 H, m, CH<sub>2</sub>), 1.81 (2 H, m, CH<sub>2</sub>), 4.02 (2 H, t, *J* 6.7, OCH<sub>2</sub>), 6.71 (1 H, d, *J* 2.8, H<sub>4</sub>), 7.02 (2 H, d, *J* 8.9, H<sub>m</sub>), 7.90 (1 H, d, *J* 2.8, H<sub>5</sub>), 7.93 (2 H, d, *J* 8.9, H<sub>o</sub>).

**[H<sub>2</sub>pz<sup>R(8)</sup>][BF<sub>4</sub>] (BF<sub>4</sub>-8):** pale yellow solid (69%). Elemental analysis: Found: C, 57.0; H, 6.9; N, 7.8%. C<sub>17</sub>H<sub>25</sub>N<sub>2</sub>OBF<sub>4</sub> requires C, 56.7; H, 7.0; N, 7.8%.  $\nu_{\max}(\text{KBr})/\text{cm}^{-1}$ : 3385, 3241  $\nu(\text{NH})$ , 1615  $\nu(\text{C}=\text{C} + \text{C}=\text{N})$ , 1083  $\nu(\text{B-F})$ .  $\delta_{\text{H}}$  (300 MHz; CDCl<sub>3</sub>; Me<sub>4</sub>Si): 0.89 (3 H, t, *J* 6.7, CH<sub>3</sub>), 1.30 (10 H, m, CH<sub>2</sub>), 1.81 (2 H, m, CH<sub>2</sub>), 4.02 (2 H, t, *J* 6.7, OCH<sub>2</sub>), 6.81 (1 H, d, *J* 2.8, H<sub>4</sub>), 7.02 (2 H, d, *J* 8.9, H<sub>m</sub>), 7.67 (2 H, d, *J* 8.9, H<sub>o</sub>), 8.14 (1 H, d, *J* 2.8, H<sub>5</sub>), 12.83 (br s, NH), 13.27 (br s, NH).

**[H<sub>2</sub>pz<sup>R(10)</sup>][BF<sub>4</sub>] (BF<sub>4</sub>-10):** pale yellow solid (73%). Elemental analysis: Found: C, 58.3; H, 7.3; N, 7.1%. C<sub>19</sub>H<sub>29</sub>N<sub>2</sub>OBF<sub>4</sub> requires C, 58.8; H, 7.5; N, 7.2%.  $\nu_{\max}(\text{KBr})/\text{cm}^{-1}$ : 3371, 3242  $\nu(\text{NH})$ , 1615  $\nu(\text{C}=\text{C} + \text{C}=\text{N})$ , 1083  $\nu(\text{B-F})$ .  $\delta_{\text{H}}$  (300 MHz; CDCl<sub>3</sub>; Me<sub>4</sub>Si): 0.88 (3 H, t, *J* 6.7, CH<sub>3</sub>), 1.29 (14 H, m, CH<sub>2</sub>), 1.81 (2 H, m, CH<sub>2</sub>), 4.01 (2 H, t, *J* 6.7, OCH<sub>2</sub>), 6.81 (1 H, d, *J* 2.8, H<sub>4</sub>), 7.02 (2 H, d, *J* 8.9, H<sub>m</sub>), 7.67 (2 H, d, *J* 8.9, H<sub>o</sub>), 8.12 (1 H,

d, *J* 2.8, H5).

**[H<sub>2</sub>pz<sup>R(12)</sup>][BF<sub>4</sub>] (BF<sub>4</sub>-12):** pale yellow solid (79%). Elemental analysis: Found: C, 60.3; H, 7.7; N, 6.5%. C<sub>21</sub>H<sub>33</sub>N<sub>2</sub>OBF<sub>4</sub> requires C, 60.6; H, 8.0; N, 6.7%.  $\nu_{\max}(\text{KBr})/\text{cm}^{-1}$ : 3375, 3236  $\nu(\text{NH})$ , 1616  $\nu(\text{C}=\text{C} + \text{C}=\text{N})$ , 1083  $\nu(\text{B-F})$ .  $\delta_{\text{H}}$  (300 MHz; CDCl<sub>3</sub>; Me<sub>4</sub>Si): 0.88 (3 H, t, *J* 6.7, CH<sub>3</sub>), 1.27 (18 H, m, CH<sub>2</sub>), 1.81 (2 H, m, CH<sub>2</sub>), 4.02 (2 H, t, *J* 6.7, OCH<sub>2</sub>), 6.81 (1 H, d, *J* 2.8, H<sub>4</sub>), 7.02 (2 H, d, *J* 8.9, H<sub>m</sub>), 7.67 (2 H, d, *J* 8.9, H<sub>o</sub>), 8.10 (1 H, d, *J* 2.8, H5).

**[H<sub>2</sub>pz<sup>R(14)</sup>][BF<sub>4</sub>] (BF<sub>4</sub>-14):** pale yellow solid (72%). Elemental analysis: Found: C, 61.9; H, 8.1; N, 6.2%. C<sub>23</sub>H<sub>37</sub>N<sub>2</sub>OBF<sub>4</sub> requires C, 62.2; H, 8.4; N, 6.3%.  $\nu_{\max}(\text{KBr})/\text{cm}^{-1}$ : 3388, 3250  $\nu(\text{NH})$ , 1616  $\nu(\text{C}=\text{C} + \text{C}=\text{N})$ , 1087  $\nu(\text{B-F})$ .  $\delta_{\text{H}}$  (300 MHz; CDCl<sub>3</sub>; Me<sub>4</sub>Si): 0.88 (3 H, t, *J* 6.7, CH<sub>3</sub>), 1.27 (22 H, m, CH<sub>2</sub>), 1.82 (2 H, m, CH<sub>2</sub>), 4.02 (2 H, t, *J* 6.7, OCH<sub>2</sub>), 6.81 (1 H, d, *J* 2.8, H<sub>4</sub>), 7.03 (2 H, d, *J* 8.9, H<sub>m</sub>), 7.67 (2 H, d, *J* 8.9, H<sub>o</sub>), 8.07 (1 H, d, *J* 2.8, H5).

**[H<sub>2</sub>pz<sup>R(16)</sup>][BF<sub>4</sub>] (BF<sub>4</sub>-16):** pale yellow solid (75%). Elemental analysis: Found: C, 63.3; H, 8.4; N, 5.7%. C<sub>25</sub>H<sub>41</sub>N<sub>2</sub>OBF<sub>4</sub> requires C, 63.6; H, 8.7; N, 5.9%.  $\nu_{\max}(\text{KBr})/\text{cm}^{-1}$ : 3385, 3250  $\nu(\text{NH})$ , 1617  $\nu(\text{C}=\text{C} + \text{C}=\text{N})$ , 1083  $\nu(\text{B-F})$ .  $\delta_{\text{H}}$  (300 MHz; CDCl<sub>3</sub>; Me<sub>4</sub>Si): 0.88 (3 H, t, *J* 6.7, CH<sub>3</sub>), 1.26 (26 H, m, CH<sub>2</sub>), 1.82 (2 H, m, CH<sub>2</sub>), 4.03 (2 H, t, *J* 6.7, OCH<sub>2</sub>), 6.82 (1 H, d, *J* 2.8, H<sub>4</sub>), 7.03 (2 H, d, *J* 8.9, H<sub>m</sub>), 7.67 (2 H, d, *J* 8.9, H<sub>o</sub>), 8.08 (1 H, d, *J* 2.8, H5).

**[H<sub>2</sub>pz<sup>R(18)</sup>][BF<sub>4</sub>] (BF<sub>4</sub>-18):** pale yellow solid (70%). Elemental analysis: Found: C, 65.2; H, 8.8; N, 5.6%. C<sub>27</sub>H<sub>45</sub>N<sub>2</sub>OBF<sub>4</sub> requires C, 64.8; H, 9.1; N, 5.6%.  $\nu_{\max}(\text{KBr})/\text{cm}^{-1}$ : 3383, 3249  $\nu(\text{NH})$ , 1619  $\nu(\text{C}=\text{C} + \text{C}=\text{N})$ , 1084  $\nu(\text{B-F})$ .  $\delta_{\text{H}}$  (300 MHz; CDCl<sub>3</sub>; Me<sub>4</sub>Si): 0.88 (3 H, t, *J* 6.7, CH<sub>3</sub>), 1.26 (30 H, m, CH<sub>2</sub>), 1.82 (2 H, m, CH<sub>2</sub>), 4.02 (2 H, t, *J* 6.7, OCH<sub>2</sub>), 6.82 (1 H, d, *J* 2.8, H<sub>4</sub>), 7.03 (2 H, d, *J* 8.9, H<sub>m</sub>), 7.67 (2 H, d, *J* 8.9, H<sub>o</sub>), 8.03 (1 H, d, *J* 2.8, H5).

**[H<sub>2</sub>pz<sup>R(1)</sup>][ReO<sub>4</sub>] (ReO<sub>4</sub>-1):** colourless solid (45%). Elemental analysis: Found: C, 27.9; H, 2.5; N, 6.4%. C<sub>10</sub>H<sub>11</sub>N<sub>2</sub>O<sub>5</sub>Re requires C, 28.2; H, 2.6; N, 6.6%.  $\nu_{\max}(\text{KBr})/\text{cm}^{-1}$ : 3138, 3121  $\nu(\text{NH})$ , 1617  $\nu(\text{C}=\text{C} + \text{C}=\text{N})$ , 896  $\nu(\text{Re-O})$ .  $\delta_{\text{H}}$  (300 MHz; CDCl<sub>3</sub>; Me<sub>4</sub>Si): 3.87 (3 H, s, CH<sub>3</sub>), 6.83 (1 H, d, *J* 2.3, H<sub>4</sub>), 6.98 (2 H, d, *J* 8.7, H<sub>m</sub>), 7.70 (2 H, d, *J* 8.7, H<sub>o</sub>), 7.91 (1 H, d, *J* 2.3, H5).

**[H<sub>2</sub>pz<sup>R(8)</sup>][ReO<sub>4</sub>] (ReO<sub>4</sub>-8):** colourless solid (75%). Elemental analysis: Found: C, 38.7; H, 4.8; N, 5.4%. C<sub>17</sub>H<sub>25</sub>N<sub>2</sub>O<sub>5</sub>Re requires C, 39.0; H, 4.8; N, 5.4%.  $\nu_{\max}(\text{KBr})/\text{cm}^{-1}$ : 3144, 3124  $\nu(\text{NH})$ , 1616  $\nu(\text{C}=\text{C} + \text{C}=\text{N})$ , 908  $\nu(\text{Re-O})$ .  $\delta_{\text{H}}$  (300 MHz; CDCl<sub>3</sub>; Me<sub>4</sub>Si): 0.89 (3 H, t, *J* 6.7, CH<sub>3</sub>), 1.29 (10 H, m, CH<sub>2</sub>), 1.81 (2 H, m, CH<sub>2</sub>), 4.02 (2 H, t, *J* 6.7, OCH<sub>2</sub>), 6.79 (1 H, d, *J* 2.3, H<sub>4</sub>), 7.04 (2 H, d, *J* 8.7, H<sub>m</sub>), 7.72 (2 H, d, *J* 8.7, H<sub>o</sub>), 7.93 (1 H, d, *J* 2.3, H5).

**[H<sub>2</sub>pz<sup>R(10)</sup>][ReO<sub>4</sub>] (ReO<sub>4</sub>-10):** colourless solid (77%). Elemental analysis: Found: C, 41.4; H, 5.3; N, 5.3%. C<sub>19</sub>H<sub>29</sub>N<sub>2</sub>O<sub>5</sub>Re requires C, 41.4; H, 5.3; N, 5.1%.  $\nu_{\max}(\text{KBr})/\text{cm}^{-1}$ : 3144, 3124  $\nu(\text{NH})$ , 1617  $\nu(\text{C}=\text{C} + \text{C}=\text{N})$ , 906  $\nu(\text{Re-O})$ .  $\delta_{\text{H}}$  (300 MHz; CDCl<sub>3</sub>; Me<sub>4</sub>Si): 0.88 (3 H, t, *J* 6.7, CH<sub>3</sub>), 1.28 (14 H, m, CH<sub>2</sub>), 1.80 (2 H, m, CH<sub>2</sub>), 4.00 (2 H, t, *J* 6.7, OCH<sub>2</sub>), 6.74 (1 H, d, *J* 2.3, H<sub>4</sub>), 7.00 (2 H, d, *J* 8.7, H<sub>m</sub>), 7.70 (2 H, d, *J* 8.7, H<sub>o</sub>), 7.92 (1 H, d, *J* 2.3, H5).

**[H<sub>2</sub>pz<sup>R(12)</sup>][ReO<sub>4</sub>] (ReO<sub>4</sub>-12):** colourless solid (76%). Elemental analysis: Found: C, 43.0; H, 5.5; N, 4.8%. C<sub>21</sub>H<sub>33</sub>N<sub>2</sub>O<sub>5</sub>Re requires C, 43.5; H, 5.7; N, 4.8%.  $\nu_{\max}(\text{KBr})/\text{cm}^{-1}$ : 3145, 3125  $\nu(\text{NH})$ , 1617  $\nu(\text{C}=\text{C} + \text{C}=\text{N})$ , 904  $\nu(\text{Re-O})$ .  $\delta_{\text{H}}$  (300 MHz; CDCl<sub>3</sub>; Me<sub>4</sub>Si): 0.88 (3 H, t, *J* 6.7, CH<sub>3</sub>), 1.27 (18 H, m, CH<sub>2</sub>), 1.81 (2 H, m, CH<sub>2</sub>), 4.02 (2 H, t, *J* 6.7, OCH<sub>2</sub>), 6.80 (1 H, d, *J* 2.3, H<sub>4</sub>), 7.02 (2 H, d, *J* 8.7, H<sub>m</sub>), 7.72 (2 H, d, *J* 8.7, H<sub>o</sub>), 7.93 (1 H, d, *J* 2.3, H5).

**[H<sub>2</sub>pz<sup>R(14)</sup>][ReO<sub>4</sub>] (ReO<sub>4</sub>-14):** colourless solid (70%). Elemental analysis: Found: C, 45.9; H, 6.1; N, 4.8%. C<sub>23</sub>H<sub>37</sub>N<sub>2</sub>O<sub>5</sub>Re requires C, 45.5; H, 6.1; N, 4.6%.  $\nu_{\max}(\text{KBr})/\text{cm}^{-1}$ : 3146, 3126  $\nu(\text{NH})$ , 1616  $\nu(\text{C}=\text{C} + \text{C}=\text{N})$ , 905  $\nu(\text{Re-O})$ .  $\delta_{\text{H}}$  (300 MHz; CDCl<sub>3</sub>; Me<sub>4</sub>Si): 0.88 (3 H, t, *J* 6.7, CH<sub>3</sub>), 1.26 (22 H, m, CH<sub>2</sub>), 1.79 (2 H, m, CH<sub>2</sub>), 3.99 (2 H, t, *J* 6.7, OCH<sub>2</sub>), 6.84 (1 H, d, *J* 2.3, H<sub>4</sub>), 6.96 (2 H, d, *J* 8.7, H<sub>m</sub>), 7.68 (2 H, d, *J* 8.7, H<sub>o</sub>), 7.92 (1 H, d, *J* 2.3, H5).

**[H<sub>2</sub>pz<sup>R(16)</sup>][ReO<sub>4</sub>] (ReO<sub>4</sub>-16):** colourless solid (62%). Elemental analysis: Found: C, 47.3; H, 6.5; N, 4.4%. C<sub>25</sub>H<sub>41</sub>N<sub>2</sub>O<sub>5</sub>Re requires C, 47.2; H, 6.5; N, 4.4%.  $\nu_{\max}(\text{KBr})/\text{cm}^{-1}$ : 3148, 3128  $\nu(\text{NH})$ , 1618  $\nu(\text{C}=\text{C} + \text{C}=\text{N})$ , 906  $\nu(\text{Re-O})$ .  $\delta_{\text{H}}$  (300 MHz; CDCl<sub>3</sub>; Me<sub>4</sub>Si): 0.88 (3 H, t, *J* 6.7, CH<sub>3</sub>), 1.26 (26 H, m, CH<sub>2</sub>), 1.80 (2 H, m, CH<sub>2</sub>), 3.99 (2 H, t, *J* 6.7, OCH<sub>2</sub>), 6.83 (1 H, d, *J* 2.3, H<sub>4</sub>), 6.96 (2 H, d, *J* 8.7, H<sub>m</sub>), 7.66 (2 H, d, *J* 8.7, H<sub>o</sub>), 7.92 (1 H, d, *J* 2.3, H5).

**[H<sub>2</sub>pz<sup>R(18)</sup>][ReO<sub>4</sub>] (ReO<sub>4</sub>-18):** colourless solid (65%). Elemental analysis: Found: C, 48.8; H, 6.7; N, 4.0%. C<sub>27</sub>H<sub>45</sub>N<sub>2</sub>O<sub>5</sub>Re requires C, 48.8; H, 6.8; N, 4.2%.  $\nu_{\max}(\text{KBr})/\text{cm}^{-1}$ : 3147, 3127  $\nu(\text{NH})$ , 1617  $\nu(\text{C}=\text{C} + \text{C}=\text{N})$ , 904  $\nu(\text{Re}-\text{O})$ .  $\delta_{\text{H}}$  (300 MHz; CDCl<sub>3</sub>; Me<sub>4</sub>Si): 0.88 (3 H, t, *J* 6.7, CH<sub>3</sub>), 1.26 (30 H, m, CH<sub>2</sub>), 1.80 (2 H, m, CH<sub>2</sub>), 3.99 (2 H, t, *J* 6.7, OCH<sub>2</sub>), 6.83 (1 H, d, *J* 2.3, H<sub>4</sub>), 6.96 (2 H, d, *J* 8.7, H<sub>m</sub>), 7.67 (2 H, d, *J* 8.7, H<sub>o</sub>), 7.92 (1 H, d, *J* 2.3, H<sub>5</sub>).

**[H<sub>2</sub>pz<sup>R(8)</sup>][SbF<sub>6</sub>] (SbF<sub>6</sub>-8):** colourless solid (49%). Elemental analysis: Found: C, 40.5; H, 4.9; N, 5.6%. C<sub>17</sub>H<sub>25</sub>N<sub>2</sub>OSbF<sub>6</sub> requires C, 40.1; H, 5.0; N, 5.5%.  $\nu_{\max}(\text{KBr})/\text{cm}^{-1}$ : 3336, 3167  $\nu(\text{NH})$ , 1616  $\nu(\text{C}=\text{C} + \text{C}=\text{N})$ , 665  $\nu(\text{Sb}-\text{F})$ .  $\delta_{\text{H}}$  (300 MHz; CDCl<sub>3</sub>; Me<sub>4</sub>Si): 0.90 (3 H, t, *J* 6.7, CH<sub>3</sub>), 1.30 (10 H, m, CH<sub>2</sub>), 1.81 (2 H, m, CH<sub>2</sub>), 4.01 (2 H, t, *J* 6.7, OCH<sub>2</sub>), 6.74 (1 H, d, *J* 2.4, H<sub>4</sub>), 7.01 (2 H, d, *J* 8.3, H<sub>m</sub>), 7.63 (2 H, d, *J* 8.3, H<sub>o</sub>), 7.87 (1 H, d, *J* 2.4, H<sub>5</sub>).

**[H<sub>2</sub>pz<sup>R(10)</sup>][SbF<sub>6</sub>] (SbF<sub>6</sub>-10):** colourless solid (62%). Elemental analysis: Found: C, 42.7; H, 5.3; N, 5.3%. C<sub>19</sub>H<sub>29</sub>N<sub>2</sub>OSbF<sub>6</sub> requires C, 42.5; H, 5.4; N, 5.2%.  $\nu_{\max}(\text{KBr})/\text{cm}^{-1}$ : 3341, 3168  $\nu(\text{NH})$ , 1615  $\nu(\text{C}=\text{C} + \text{C}=\text{N})$ , 666  $\nu(\text{Sb}-\text{F})$ .  $\delta_{\text{H}}$  (300 MHz; CDCl<sub>3</sub>; Me<sub>4</sub>Si): 0.88 (3 H, t, *J* 6.7, CH<sub>3</sub>), 1.28 (14 H, m, CH<sub>2</sub>), 1.81 (2 H, m, CH<sub>2</sub>), 4.01 (2 H, t, *J* 6.7, OCH<sub>2</sub>), 6.70 (1 H, d, *J* 2.4, H<sub>4</sub>), 6.99 (2 H, d, *J* 8.3, H<sub>m</sub>), 7.63 (2 H, d, *J* 8.3, H<sub>o</sub>), 7.80 (1 H, d, *J* 2.4, H<sub>5</sub>).

**[H<sub>2</sub>pz<sup>R(12)</sup>][SbF<sub>6</sub>] (SbF<sub>6</sub>-12):** colourless solid (59%). Elemental analysis: Found: C, 44.2; H, 5.6; N, 4.9%. C<sub>21</sub>H<sub>33</sub>N<sub>2</sub>OSbF<sub>6</sub> requires C, 44.6; H, 5.9; N, 5.0%.  $\nu_{\max}(\text{KBr})/\text{cm}^{-1}$ : 3338, 3168  $\nu(\text{NH})$ , 1614  $\nu(\text{C}=\text{C} + \text{C}=\text{N})$ , 665  $\nu(\text{Sb}-\text{F})$ .  $\delta_{\text{H}}$  (300 MHz; CDCl<sub>3</sub>; Me<sub>4</sub>Si): 0.88 (3 H, t, *J* 6.7, CH<sub>3</sub>), 1.26 (18 H, m, CH<sub>2</sub>), 1.82 (2 H, m, CH<sub>2</sub>), 4.04 (2 H, t, *J* 6.7, OCH<sub>2</sub>), 6.82 (1 H, d, *J* 2.4, H<sub>4</sub>), 7.07 (2 H, d, *J* 8.3, H<sub>m</sub>), 7.64 (2 H, d, *J* 8.3, H<sub>o</sub>), 7.89 (1 H, d, *J* 2.4, H<sub>5</sub>).

**[H<sub>2</sub>pz<sup>R(14)</sup>][SbF<sub>6</sub>] (SbF<sub>6</sub>-14):** colourless solid (62%). Elemental analysis: Found: C, 46.5; H, 5.9; N, 4.7%. C<sub>23</sub>H<sub>37</sub>N<sub>2</sub>OSbF<sub>6</sub> requires C, 46.6; H, 6.2; N, 4.7%.  $\nu_{\max}(\text{KBr})/\text{cm}^{-1}$ : 3338, 3170  $\nu(\text{NH})$ , 1614  $\nu(\text{C}=\text{C} + \text{C}=\text{N})$ , 666  $\nu(\text{Sb}-\text{F})$ .  $\delta_{\text{H}}$  (300 MHz; CDCl<sub>3</sub>; Me<sub>4</sub>Si): 0.88 (3 H, t, *J* 6.7, CH<sub>3</sub>), 1.26 (22 H, m, CH<sub>2</sub>), 1.81 (2 H, m, CH<sub>2</sub>), 4.03 (2 H, t, *J* 6.7, OCH<sub>2</sub>), 6.85 (1 H, d, *J* 2.4, H<sub>4</sub>), 7.05 (2 H, d, *J* 8.3, H<sub>m</sub>), 7.65 (2 H, d, *J* 8.3, H<sub>o</sub>), 7.92 (1 H, d, *J* 2.4, H<sub>5</sub>).

**[H<sub>2</sub>pz<sup>R(16)</sup>][SbF<sub>6</sub>] (SbF<sub>6</sub>-16):** colourless solid (43%). Elemental analysis: Found: C, 47.9; H, 6.6; N, 4.5%. C<sub>25</sub>H<sub>41</sub>N<sub>2</sub>OSbF<sub>6</sub> requires C, 48.3; H, 6.6; N, 4.5%.  $\nu_{\max}(\text{KBr})/\text{cm}^{-1}$ : 3340, 3170  $\nu(\text{NH})$ , 1616  $\nu(\text{C}=\text{C} + \text{C}=\text{N})$ , 653  $\nu(\text{Sb}-\text{F})$ .  $\delta_{\text{H}}$  (300 MHz; CDCl<sub>3</sub>; Me<sub>4</sub>Si): 0.88 (3 H, t, *J* 6.7, CH<sub>3</sub>), 1.26 (26 H, m, CH<sub>2</sub>), 1.80 (2 H, m, CH<sub>2</sub>), 3.99 (2 H, t, *J* 6.7, OCH<sub>2</sub>), 6.80 (1 H, d, *J* 2.4, H<sub>4</sub>), 6.96 (2 H, d, *J* 8.3, H<sub>m</sub>), 7.65 (2 H, d, *J* 8.3, H<sub>o</sub>), 7.86 (1 H, d, *J* 2.4, H<sub>5</sub>).

**[H<sub>2</sub>pz<sup>R(18)</sup>][SbF<sub>6</sub>] (SbF<sub>6</sub>-18):** colourless solid (55%). Elemental analysis: Found: C, 50.0; H, 6.7; N, 4.4%. C<sub>27</sub>H<sub>45</sub>N<sub>2</sub>OSbF<sub>6</sub> requires C, 49.9; H, 7.0; N, 4.3%.  $\nu_{\max}(\text{KBr})/\text{cm}^{-1}$ : 3338, 3170  $\nu(\text{NH})$ , 1616  $\nu(\text{C}=\text{C} + \text{C}=\text{N})$ , 651  $\nu(\text{Sb}-\text{F})$ .  $\delta_{\text{H}}$  (300 MHz; CDCl<sub>3</sub>; Me<sub>4</sub>Si): 0.88 (3 H, t, *J* 6.7, CH<sub>3</sub>), 1.26 (30 H, m, CH<sub>2</sub>), 1.80 (2 H, m, CH<sub>2</sub>), 3.99 (2 H, t, *J* 6.7, OCH<sub>2</sub>), 6.79 (1 H, d, *J* 2.4, H<sub>4</sub>), 6.96 (2 H, d, *J* 8.3, H<sub>m</sub>), 7.67 (2 H, d, *J* 8.3, H<sub>o</sub>), 7.87 (1 H, d, *J* 2.4, H<sub>5</sub>).

**[H<sub>2</sub>pz<sup>R(1)</sup>][OTf] (OTf-1):** colourless solid (67%). Elemental analysis: Found: C, 41.1; H, 3.5; N, 8.7; S, 9.7%. C<sub>11</sub>H<sub>11</sub>N<sub>2</sub>SO<sub>4</sub>F<sub>3</sub> requires C, 40.7; H, 3.4; N, 8.6; S, 9.9%.  $\nu_{\max}(\text{KBr})/\text{cm}^{-1}$ : 3145  $\nu(\text{NH})$ , 1615  $\nu(\text{C}=\text{C} + \text{C}=\text{N})$ , 1260, 1026  $\nu(\text{SO})$ .  $\delta_{\text{H}}$  (300 MHz; CDCl<sub>3</sub>; Me<sub>4</sub>Si): 3.88 (3 H, s, CH<sub>3</sub>), 6.78 (1 H, d, *J* 2.8, H<sub>4</sub>), 7.04 (2 H, d, *J* 8.8, H<sub>m</sub>), 7.71 (2 H, d, *J* 8.8, H<sub>o</sub>), 8.08 (1 H, d, *J* 2.8, H<sub>5</sub>).

**[H<sub>2</sub>pz<sup>R(8)</sup>][OTf] (OTf-8):** colourless solid (75%). Elemental analysis: Found: C, 50.9; H, 5.8; N, 6.6; S, 7.6%. C<sub>18</sub>H<sub>25</sub>N<sub>2</sub>SO<sub>4</sub>F<sub>3</sub> requires C, 51.2; H, 6.0; N, 6.6; S, 7.6%.  $\nu_{\max}(\text{KBr})/\text{cm}^{-1}$ : 3136  $\nu(\text{NH})$ , 1618  $\nu(\text{C}=\text{C} + \text{C}=\text{N})$ , 1257, 1032  $\nu(\text{SO})$ .  $\delta_{\text{H}}$  (300 MHz; CDCl<sub>3</sub>; Me<sub>4</sub>Si): 0.90 (3 H, t, *J* 6.7, CH<sub>3</sub>), 1.30 (10 H, m, CH<sub>2</sub>), 1.82 (2 H, m, CH<sub>2</sub>), 4.03 (2 H, t, *J* 6.7, OCH<sub>2</sub>), 6.79 (1 H, d, *J* 2.8, H<sub>4</sub>), 7.03 (2 H, d, *J* 8.8, H<sub>m</sub>), 7.70 (2 H, d, *J* 8.8, H<sub>o</sub>), 8.11 (1 H, d, *J* 2.8, H<sub>5</sub>), 13.67 (br s, NH), 14.51 (br s, NH).

**[H<sub>2</sub>pz<sup>R(10)</sup>][OTf] (OTf-10):** colourless solid (77%). Elemental analysis: Found: C, 53.1; H, 6.3; N, 6.2; S, 7.1%. C<sub>20</sub>H<sub>29</sub>N<sub>2</sub>SO<sub>4</sub>F<sub>3</sub> requires C, 53.3; H, 6.5; N, 6.2; S, 7.1%.  $\nu_{\max}(\text{KBr})/\text{cm}^{-1}$ : 3137  $\nu(\text{NH})$ , 1619  $\nu(\text{C}=\text{C} + \text{C}=\text{N})$ , 1257, 1031  $\nu(\text{SO})$ .  $\delta_{\text{H}}$  (300 MHz; CDCl<sub>3</sub>; Me<sub>4</sub>Si): 0.88 (3 H, t, *J* 6.7, CH<sub>3</sub>), 1.29 (14 H, m, CH<sub>2</sub>), 1.81 (2 H, m, CH<sub>2</sub>), 4.02 (2 H, t, *J* 6.7, OCH<sub>2</sub>), 6.78 (1 H, d, *J* 2.8, H<sub>4</sub>), 7.03 (2 H, d, *J* 8.8, H<sub>m</sub>), 7.70 (2 H, d, *J* 8.8, H<sub>o</sub>), 8.10 (1 H, d, *J* 2.8, H<sub>5</sub>).

**[H<sub>2</sub>pz<sup>R(12)</sup>][OTf] (OTf-12):** colourless solid (81%). Elemental analysis: Found: C, 54.8; H, 6.6; N, 5.8; S,

6.5%.  $C_{22}H_{33}N_2SO_4F_3$  requires C, 55.2; H, 6.9; N, 5.8; S, 6.7%.  $\nu_{\max}(\text{KBr})/\text{cm}^{-1}$ : 3137  $\nu(\text{NH})$ , 1618  $\nu(\text{C}=\text{C} + \text{C}=\text{N})$ , 1257, 1031  $\nu(\text{SO})$ .  $\delta_{\text{H}}$  (300 MHz;  $\text{CDCl}_3$ ;  $\text{Me}_4\text{Si}$ ): 0.88 (3 H, t,  $J$  6.7,  $\text{CH}_3$ ), 1.27 (18 H, m,  $\text{CH}_2$ ), 1.81 (2 H, m,  $\text{CH}_2$ ), 4.02 (2 H, t,  $J$  6.7,  $\text{OCH}_2$ ), 6.78 (1 H, d,  $J$  2.8, H4), 7.03 (2 H, d,  $J$  8.8,  $\text{H}_m$ ), 7.70 (2 H, d,  $J$  8.8,  $\text{H}_o$ ), 8.08 (1 H, d,  $J$  2.8, H5).

**[H<sub>2</sub>pz<sup>R(14)</sup>][OTf] (OTf-14)**: colourless solid (80%). Elemental analysis: Found: C, 57.2; H, 7.4; N, 5.7; S, 6.6%.  $C_{24}H_{37}N_2SO_4F_3$  requires C, 56.9; H, 7.4; N, 5.5; S, 6.3%.  $\nu_{\max}(\text{KBr})/\text{cm}^{-1}$ : 3138  $\nu(\text{NH})$ , 1618  $\nu(\text{C}=\text{C} + \text{C}=\text{N})$ , 1257, 1032  $\nu(\text{SO})$ .  $\delta_{\text{H}}$  (300 MHz;  $\text{CDCl}_3$ ;  $\text{Me}_4\text{Si}$ ): 0.88 (3 H, t,  $J$  6.7,  $\text{CH}_3$ ), 1.27 (22 H, m,  $\text{CH}_2$ ), 1.81 (2 H, m,  $\text{CH}_2$ ), 4.02 (2 H, t,  $J$  6.7,  $\text{OCH}_2$ ), 6.78 (1 H, d,  $J$  2.8, H4), 7.03 (2 H, d,  $J$  8.8,  $\text{H}_m$ ), 7.72 (2 H, d,  $J$  8.8,  $\text{H}_o$ ), 8.10 (1 H, d,  $J$  2.8, H5).

**[H<sub>2</sub>pz<sup>R(16)</sup>][OTf] (OTf-16)**: colourless solid (72%). Elemental analysis: Found: C, 58.4; H, 7.5; N, 5.2; S, 5.9%.  $C_{26}H_{41}N_2SO_4F_3$  requires C, 58.4; H, 7.7; N, 5.3; S, 6.0%.  $\nu_{\max}(\text{KBr})/\text{cm}^{-1}$ : 3137  $\nu(\text{NH})$ , 1618  $\nu(\text{C}=\text{C} + \text{C}=\text{N})$ , 1258, 1031  $\nu(\text{SO})$ .  $\delta_{\text{H}}$  (300 MHz;  $\text{CDCl}_3$ ;  $\text{Me}_4\text{Si}$ ): 0.88 (3 H, t,  $J$  6.7,  $\text{CH}_3$ ), 1.26 (26 H, m,  $\text{CH}_2$ ), 1.81 (2 H, m,  $\text{CH}_2$ ), 4.02 (2 H, t,  $J$  6.7,  $\text{OCH}_2$ ), 6.79 (1 H, d,  $J$  2.8, H4), 7.03 (2 H, d,  $J$  8.8,  $\text{H}_m$ ), 7.69 (2 H, d,  $J$  8.8,  $\text{H}_o$ ), 8.07 (1 H, d,  $J$  2.8, H5).

**[H<sub>2</sub>pz<sup>R(18)</sup>][OTf] (OTf-18)**: colourless solid (69%). Elemental analysis: Found: C, 60.2; H, 7.8; N, 5.0; S, 5.3%.  $C_{28}H_{45}N_2SO_4F_3$  requires C, 59.8; H, 8.1; N, 5.0; S, 5.7%.  $\nu_{\max}(\text{KBr})/\text{cm}^{-1}$ : 3137  $\nu(\text{NH})$ , 1619  $\nu(\text{C}=\text{C} + \text{C}=\text{N})$ , 1256, 1032  $\nu(\text{SO})$ .  $\delta_{\text{H}}$  (300 MHz;  $\text{CDCl}_3$ ;  $\text{Me}_4\text{Si}$ ): 0.88 (3 H, t,  $J$  6.7,  $\text{CH}_3$ ), 1.26 (30 H, m,  $\text{CH}_2$ ), 1.81 (2 H, m,  $\text{CH}_2$ ), 4.02 (2 H, t,  $J$  6.7,  $\text{OCH}_2$ ), 6.80 (1 H, d,  $J$  2.8, H4), 7.03 (2 H, d,  $J$  8.8,  $\text{H}_m$ ), 7.73 (2 H, d,  $J$  8.8,  $\text{H}_o$ ), 8.07 (1 H, d,  $J$  2.8, H5).

**[H<sub>2</sub>pz<sup>R(1)</sup>][PTS] (PTS-1)**: colourless solid (68%). Elemental analysis: Found: C, 58.7; H, 5.2; N, 8.0; S, 9.2%.  $C_{14}H_{18}N_2SO_4$  requires C, 58.9; H, 5.2; N, 8.1; S, 9.3%.  $\nu_{\max}(\text{KBr})/\text{cm}^{-1}$ : 3196, 3135  $\nu(\text{NH})$ , 1615  $\nu(\text{C}=\text{C} + \text{C}=\text{N})$ , 1186, 1030  $\nu(\text{SO})$ .  $\delta_{\text{H}}$  (300 MHz;  $\text{CDCl}_3$ ;  $\text{Me}_4\text{Si}$ ): 2.36 (3 H, s,  $\text{CH}_3(\text{PTS})$ ), 3.85 (3 H, s,  $\text{CH}_3$ ), 6.70 (1 H, d,  $J$  2.7, H4), 6.97 (2 H, d,  $J$  8.7,  $\text{H}_m$ ), 7.19 (2 H, d,  $J$  8.1,  $\text{H}_o(\text{PTS})$ ), 7.75 (2 H, d,  $J$  8.7,  $\text{H}_o$ ), 7.85 (2 H, d,  $J$  8.1,  $\text{H}_m(\text{PTS})$ ), 8.09 (1 H, d,  $J$  2.7, H5).

**[H<sub>2</sub>pz<sup>R(8)</sup>][PTS] (PTS-8)**: colourless solid (85%). Elemental analysis: Found: C, 64.7; H, 7.1; N, 6.3; S, 7.1%.  $C_{24}H_{32}N_2SO_4$  requires C, 64.8; H, 7.2; N, 6.3; S, 7.2%.  $\nu_{\max}(\text{KBr})/\text{cm}^{-1}$ : 3218, 3136  $\nu(\text{NH})$ , 1617  $\nu(\text{C}=\text{C} + \text{C}=\text{N})$ , 1186, 1021  $\nu(\text{SO})$ .  $\delta_{\text{H}}$  (300 MHz;  $\text{CDCl}_3$ ;  $\text{Me}_4\text{Si}$ ): 0.89 (3 H, t,  $J$  6.7,  $\text{CH}_3$ ), 1.29 (10 H, m,  $\text{CH}_2$ ), 1.80 (2 H, m,  $\text{CH}_2$ ), 2.36 (3 H, s,  $\text{CH}_3(\text{PTS})$ ), 3.99 (2 H, t,  $J$  6.7,  $\text{OCH}_2$ ), 6.70 (1 H, d,  $J$  2.7, H4), 6.97 (2 H, d,  $J$  8.7,  $\text{H}_m$ ), 7.20 (2 H, d,  $J$  8.1,  $\text{H}_o(\text{PTS})$ ), 7.73 (2 H, d,  $J$  8.7,  $\text{H}_o$ ), 7.84 (2 H, d,  $J$  8.1,  $\text{H}_m(\text{PTS})$ ), 8.05 (1 H, d,  $J$  2.7, H5).

**[H<sub>2</sub>pz<sup>R(10)</sup>][PTS] (PTS-10)**: colourless solid (83%). Elemental analysis: Found: C, 66.3; H, 7.5; N, 5.9; S, 6.8%.  $C_{26}H_{36}N_2SO_4$  requires C, 66.1; H, 7.7; N, 5.9; S, 6.8%.  $\nu_{\max}(\text{KBr})/\text{cm}^{-1}$ : 3221, 3139  $\nu(\text{NH})$ , 1616  $\nu(\text{C}=\text{C} + \text{C}=\text{N})$ , 1176, 1027  $\nu(\text{SO})$ .  $\delta_{\text{H}}$  (300 MHz;  $\text{CDCl}_3$ ;  $\text{Me}_4\text{Si}$ ): 0.88 (3 H, t,  $J$  6.7,  $\text{CH}_3$ ), 1.27 (14 H, m,  $\text{CH}_2$ ), 1.79 (2 H, m,  $\text{CH}_2$ ), 2.36 (3 H, s,  $\text{CH}_3(\text{PTS})$ ), 3.99 (2 H, t,  $J$  6.7,  $\text{OCH}_2$ ), 6.70 (1 H, d,  $J$  2.7, H4), 6.95 (2 H, d,  $J$  8.7,  $\text{H}_m$ ), 7.20 (2 H, d,  $J$  8.1,  $\text{H}_o(\text{PTS})$ ), 7.73 (2 H, d,  $J$  8.7,  $\text{H}_o$ ), 7.84 (2 H, d,  $J$  8.1,  $\text{H}_m(\text{PTS})$ ), 8.03 (1 H, d,  $J$  2.7, H5).

**[H<sub>2</sub>pz<sup>R(12)</sup>][PTS] (PTS-12)**: colourless solid (86%). Elemental analysis: Found: C, 67.2; H, 7.7; N, 5.6; S, 6.4%.  $C_{28}H_{40}N_2SO_4$  requires C, 67.2; H, 8.0; N, 5.6; S, 6.4%.  $\nu_{\max}(\text{KBr})/\text{cm}^{-1}$ : 3220, 3139  $\nu(\text{NH})$ , 1616  $\nu(\text{C}=\text{C} + \text{C}=\text{N})$ , 1176, 1028  $\nu(\text{SO})$ .  $\delta_{\text{H}}$  (300 MHz;  $\text{CDCl}_3$ ;  $\text{Me}_4\text{Si}$ ): 0.88 (3 H, t,  $J$  6.7,  $\text{CH}_3$ ), 1.27 (18 H, m,  $\text{CH}_2$ ), 1.80 (2 H, m,  $\text{CH}_2$ ), 2.36 (3 H, s,  $\text{CH}_3(\text{PTS})$ ), 3.99 (2 H, t,  $J$  6.7,  $\text{OCH}_2$ ), 6.69 (1 H, d,  $J$  2.7, H4), 6.96 (2 H, d,  $J$  8.7,  $\text{H}_m$ ), 7.19 (2 H, d,  $J$  8.1,  $\text{H}_o(\text{PTS})$ ), 7.73 (2 H, d,  $J$  8.7,  $\text{H}_o$ ), 7.84 (2 H, d,  $J$  8.1,  $\text{H}_m(\text{PTS})$ ), 8.07 (1 H, d,  $J$  2.7, H5).

**[H<sub>2</sub>pz<sup>R(14)</sup>][PTS] (PTS-14)**: colourless solid (78%). Elemental analysis: Found: C, 67.9; H, 8.2; N, 5.4; S, 6.1%.  $C_{30}H_{44}N_2SO_4$  requires C, 68.2; H, 8.4; N, 5.3; S, 6.1%.  $\nu_{\max}(\text{KBr})/\text{cm}^{-1}$ : 3222, 3140  $\nu(\text{NH})$ , 1616  $\nu(\text{C}=\text{C} + \text{C}=\text{N})$ , 1176, 1028  $\nu(\text{SO})$ .  $\delta_{\text{H}}$  (300 MHz;  $\text{CDCl}_3$ ;  $\text{Me}_4\text{Si}$ ): 0.88 (3 H, t,  $J$  6.7,  $\text{CH}_3$ ), 1.26 (22 H, m,  $\text{CH}_2$ ), 1.79 (2 H, m,  $\text{CH}_2$ ), 2.36 (3 H, s,  $\text{CH}_3(\text{PTS})$ ), 3.98 (2 H, t,  $J$  6.7,  $\text{OCH}_2$ ), 6.68 (1 H, d,  $J$  2.7, H4), 6.96 (2 H, d,  $J$  8.7,  $\text{H}_m$ ), 7.19 (2 H, d,  $J$  8.1,  $\text{H}_o(\text{PTS})$ ), 7.73 (2 H, d,  $J$  8.7,  $\text{H}_o$ ), 7.84 (2 H, d,  $J$  8.1,  $\text{H}_m(\text{PTS})$ ), 8.09 (1 H, d,  $J$  2.7, H5).

**[H<sub>2</sub>pz<sup>R(16)</sup>][PTS] (PTS-16)**: colourless solid (76%). Elemental analysis: Found: C, 68.7; H, 8.4; N, 5.1; S, 5.6%.  $C_{32}H_{48}N_2SO_4$  requires C, 69.0; H, 8.7; N, 5.0; S, 5.7%.  $\nu_{\max}(\text{KBr})/\text{cm}^{-1}$ : 3220, 3140  $\nu(\text{NH})$ , 1616  $\nu(\text{C}=\text{C} + \text{C}=\text{N})$ , 1176, 1028  $\nu(\text{SO})$ .  $\delta_{\text{H}}$  (300 MHz;  $\text{CDCl}_3$ ;  $\text{Me}_4\text{Si}$ ): 0.88 (3 H, t,  $J$  6.7,  $\text{CH}_3$ ), 1.26 (26 H, m,  $\text{CH}_2$ ), 1.79 (2 H, m,  $\text{CH}_2$ ), 2.36 (3 H, s,  $\text{CH}_3(\text{PTS})$ ), 3.98 (2 H, t,  $J$  6.7,  $\text{OCH}_2$ ), 6.68 (1 H, d,  $J$  2.7, H4), 6.96 (2 H, d,  $J$  8.7,  $\text{H}_m$ ), 7.19 (2 H, d,  $J$  8.1,  $\text{H}_o(\text{PTS})$ ), 7.73 (2 H, d,  $J$  8.7,  $\text{H}_o$ ), 7.84 (2 H, d,  $J$  8.1,  $\text{H}_m(\text{PTS})$ ), 8.10 (1 H, d,  $J$  2.7, H5).

H5).

**[H<sub>2</sub>pz<sup>R(18)</sup>][PTS] (PTS-18)**: colourless solid (79%). Elemental analysis: Found: C, 69.9; H, 8.8; N, 4.9; S, 5.3%. C<sub>34</sub>H<sub>52</sub>N<sub>2</sub>SO<sub>4</sub> requires C, 69.8; H, 9.0; N, 4.8; S, 5.5%.  $\nu_{\max}(\text{KBr})/\text{cm}^{-1}$ : 3220, 3140  $\nu(\text{NH})$ , 1616  $\nu(\text{C}=\text{C} + \text{C}=\text{N})$ , 1176, 1028  $\nu(\text{SO})$ .  $\delta_{\text{H}}$  (300 MHz; CDCl<sub>3</sub>; Me<sub>4</sub>Si): 0.88 (3 H, t, *J* 6.7, CH<sub>3</sub>), 1.26 (30 H, m, CH<sub>2</sub>), 1.79 (2 H, m, CH<sub>2</sub>), 2.36 (3 H, s, CH<sub>3</sub>(PTS)), 3.99 (2 H, t, *J* 6.7, OCH<sub>2</sub>), 6.68 (1 H, d, *J* 2.7, H<sub>4</sub>), 6.96 (2 H, d, *J* 8.7, H<sub>m</sub>), 7.19 (2 H, d, *J* 8.1, H<sub>o</sub>(PTS)), 7.71 (2 H, d, *J* 8.7, H<sub>o</sub>), 7.85 (2 H, d, *J* 8.1, H<sub>m</sub>(PTS)), 8.02 (1 H, d, *J* 2.7, H5).

**Table S1** Selected bond distances (Å) and angles (°) for **BF<sub>4</sub>-10**

|            |          |              |          |
|------------|----------|--------------|----------|
| N1–N2      | 1.353(3) | N1–N2–C3     | 108.3(3) |
| N1–C5      | 1.348(4) | N2–N1–C5     | 109.2(3) |
| N2–C3      | 1.313(4) | N2–C3–C4     | 109.3(3) |
| C3–C4      | 1.372(4) | N1–C5–C4     | 106.6(3) |
| C4–C5      | 1.384(4) | C3–C4–C5     | 106.5(3) |
| C3–C6      | 1.453(4) | N1–C5–C6     | 122.2(3) |
| B–F (mean) | 1.35     | C4–C5–C6     | 131.1(3) |
|            |          | F–B–F (mean) | 109.4    |

**Table S2** Selected bond distances (Å) and angles (°) for **Cl-1**

|       |          |          |          |
|-------|----------|----------|----------|
| N1–N2 | 1.348(3) | N1–N2–C3 | 110.2(2) |
| N1–C5 | 1.329(3) | N2–N1–C5 | 107.7(3) |
| N2–C3 | 1.336(3) | N2–C3–C4 | 106.2(3) |
| C3–C4 | 1.395(4) | N1–C5–C4 | 109.1(3) |
| C4–C5 | 1.365(4) | C3–C4–C5 | 106.7(3) |
| C3–C6 | 1.453(4) | N2–C3–C6 | 123.1(3) |
|       |          | C4–C3–C6 | 130.7(3) |

**Table S3** Selected bond distances (Å) and angles (°) for **PTS-1**

|            |          |              |          |
|------------|----------|--------------|----------|
| N1–N2      | 1.333(5) | N1–N2–C3     | 109.1(5) |
| N1–C5      | 1.341(6) | N2–N1–C5     | 109.3(5) |
| N2–C3      | 1.331(6) | N2–C3–C4     | 107.7(6) |
| C3–C4      | 1.368(6) | N1–C5–C4     | 106.6(5) |
| C4–C5      | 1.381(7) | C3–C4–C5     | 107.3(5) |
| C5–C6      | 1.448(7) | N1–C5–C6     | 122.6(6) |
| N3–N4      | 1.347(5) | C4–C5–C6     | 130.8(5) |
| N3–C22     | 1.335(6) | N3–N4–C20    | 107.2(5) |
| N4–C20     | 1.351(6) | N4–N3–C22    | 111.1(5) |
| C20–C21    | 1.385(6) | N4–C20–C21   | 108.0(5) |
| C21–C22    | 1.384(7) | N3–C22–C21   | 106.5(5) |
| C22–C23    | 1.448(7) | C20–C21–C22  | 107.2(5) |
| N5–N6      | 1.326(6) | N3–C22–C23   | 123.3(6) |
| N5–C39     | 1.348(6) | C21–C22–C23  | 130.1(6) |
| N6–C37     | 1.325(6) | N5–N6–C37    | 109.8(5) |
| C37–C38    | 1.376(7) | N6–N5–C39    | 108.8(5) |
| C38–C39    | 1.388(7) | N6–C37–C38   | 108.2(6) |
| C39–C40    | 1.464(7) | N5–C39–C38   | 107.3(5) |
| S–O (mean) | 1.45     | C37–C38–C39  | 105.9(5) |
|            |          | N5–C39–C40   | 122.0(6) |
|            |          | C38–C39–C40  | 130.7(6) |
|            |          | O–S–O (mean) | 112.8    |

**Table S4** Selected bond distances (Å) and angles (°) for **OTf-1**

|            |          |              |          |
|------------|----------|--------------|----------|
| N1–N2      | 1.350(5) | N1–N2–C3     | 108.6(4) |
| N1–C5      | 1.349(5) | N2–N1–C5     | 109.3(4) |
| N2–C3      | 1.327(5) | N2–C3–C4     | 108.5(4) |
| C3–C4      | 1.374(6) | N1–C5–C4     | 106.6(4) |
| C4–C5      | 1.387(6) | C3–C4–C5     | 107.0(4) |
| C5–C6      | 1.456(6) | N1–C5–C6     | 122.3(4) |
| S–O (mean) | 1.43     | C4–C5–C6     | 131.1(4) |
|            |          | O–S–O (mean) | 116.1    |

**Table S5** Selected bond distances (Å) and angles (°) for **ReO<sub>4</sub>-1**

|             |          |               |          |
|-------------|----------|---------------|----------|
| N1–N2       | 1.348(6) | N1–N2–C3      | 110.3(4) |
| N1–C5       | 1.310(6) | N2–N1–C5      | 107.9(5) |
| N2–C3       | 1.341(6) | N2–C3–C4      | 106.1(4) |
| C3–C4       | 1.405(7) | N1–C5–C4      | 110.0(5) |
| C4–C5       | 1.377(8) | C3–C4–C5      | 105.6(5) |
| C3–C6       | 1.464(7) | N2–C3–C6      | 122.8(4) |
| Re–O (mean) | 1.72     | C4–C3–C6      | 131.1(5) |
|             |          | O–Re–O (mean) | 109.5    |

**Table S6** Thermal data of compounds of the families **V (OTf-n)** and **VI (PTS-n)**

| Compound      | Transition                          | T / °C | ΔH / kJmol <sup>-1</sup> | Compound                            | Transition                          | T / °C | ΔH / kJmol <sup>-1</sup> |
|---------------|-------------------------------------|--------|--------------------------|-------------------------------------|-------------------------------------|--------|--------------------------|
| <b>OTf-8</b>  | Cr → Cr <sup>+</sup>                | 72     | 13.0                     | <b>PTS-8</b>                        | Cr → Cr <sup>+</sup>                | 60     | 6.2                      |
|               | Cr <sup>+</sup> → I                 | 155    | 27.1                     |                                     | Cr <sup>+</sup> → Cr <sup>2+</sup>  | 110    | 4.4                      |
| <b>OTf-10</b> | Cr → Cr <sup>+</sup>                | 83     | 7.4                      | <b>PTS-10</b>                       | Cr <sup>2+</sup> → I                | 161    | 27.8                     |
|               | Cr <sup>+</sup> → Cr <sup>2+</sup>  | 86     | 4.6                      |                                     | Cr → Cr <sup>+</sup>                | 64     | 7.6                      |
|               | Cr <sup>2+</sup> → Cr <sup>3+</sup> | 110    | 2.6                      |                                     | Cr <sup>+</sup> → Cr <sup>2+</sup>  | 113    | 5.9                      |
| <b>OTf-12</b> | Cr <sup>3+</sup> → I                | 146    | 17.4                     | <b>PTS-12</b>                       | Cr <sup>2+</sup> → Cr <sup>3+</sup> | 125    | 2.6                      |
|               | Cr → Cr <sup>+</sup>                | 100    | 9.9                      |                                     | Cr <sup>3+</sup> → I                | 151    | 23.8                     |
|               | Cr <sup>+</sup> → Cr <sup>2+</sup>  | 106    | 5.8                      |                                     | Cr → Cr <sup>+</sup>                | 70     | 12.1                     |
|               | Cr <sup>2+</sup> → I                | 142    | 23.7                     |                                     | Cr <sup>+</sup> → Cr <sup>2+</sup>  | 111    | 3.3                      |
| <b>OTf-14</b> | Cr → Cr <sup>+</sup>                | 81     | 3.1                      | <b>PTS-14</b>                       | Cr <sup>2+</sup> → Cr <sup>3+</sup> | 117    | 11.9                     |
|               | Cr <sup>+</sup> → Cr <sup>2+</sup>  | 107    | 12.5                     |                                     | Cr <sup>3+</sup> → I                | 148    | 39.1                     |
|               | Cr <sup>2+</sup> → I                | 132    | 23.9                     |                                     | Cr → Cr <sup>+</sup>                | 77     | 17.1                     |
| <b>OTf-16</b> | Cr → Cr <sup>+</sup>                | 115    | 20.1                     | <b>PTS-16</b>                       | Cr <sup>+</sup> → Cr <sup>2+</sup>  | 113    | 2.0                      |
|               | Cr <sup>+</sup> → I                 | 135    | 40.3                     |                                     | Cr <sup>2+</sup> → Cr <sup>3+</sup> | 123    | 10.0                     |
| <b>OTf-18</b> | Cr → Cr <sup>+</sup>                | 89     | 4.8                      | <b>PTS-18</b>                       | Cr <sup>3+</sup> → I                | 147    | 17.3                     |
|               | Cr <sup>+</sup> → Cr <sup>2+</sup>  | 116    | 16.9                     |                                     | Cr → Cr <sup>+</sup>                | 87     | 22.7                     |
|               | Cr <sup>2+</sup> → I                | 127    | 18.5                     |                                     | Cr <sup>+</sup> → Cr <sup>2+</sup>  | 124    | 16.9                     |
|               |                                     |        |                          | Cr <sup>2+</sup> → I                | 149                                 | 25.4   |                          |
|               |                                     |        |                          | Cr → Cr <sup>+</sup>                | 90                                  | 2.5    |                          |
|               |                                     |        |                          | Cr <sup>+</sup> → Cr <sup>2+</sup>  | 94                                  | 22.2   |                          |
|               |                                     |        |                          | Cr <sup>2+</sup> → Cr <sup>3+</sup> | 124                                 | 15.4   |                          |
|               |                                     |        |                          | Cr <sup>3+</sup> → I                | 144                                 | 14.6   |                          |

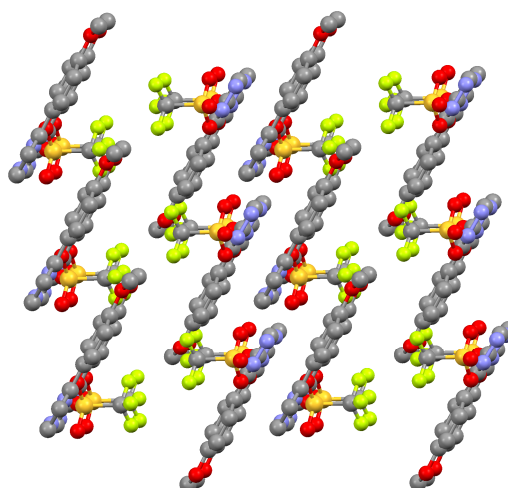

**Fig. S1** Packing of **OTf-1** in the *ac* plane
